# Supplementary material for: Generation of Induced Pluripotent Stem Cells from Human Nasal Epithelial Cells Using a Sendai Virus Vector
Source: PLoS One. 2012 Aug 13;7(8):e42855. doi: 10.1371/journal.pone.0042855 (PMC3418281; doi:10.1371/journal.pone.0042855)
Supplement: Table S1 — Primers used for RT-PCR. (XLS) [file pone.0042855.s005.xls]

## Sheet: Sheet1
Table S1 Primers used for RT-PCR
target genes	primer(Forward)	primer(Reverse)	Tm(℃)	Cycles
RT-PCR
hOCT3/4(endo)	GACAGGGGGAGGGGAGGAGCTAGG	CTTCCCTCCAACCAGTTGCCCCAAAC	56	35
hSOX2(endo)	GGGAAATGGGAGGGGTGCAAAAGAGG	TTGCGTGAGTGTGGATGGGATTGGTG	56	30
hKLF4(endo)	ACGATCGTGGCCCCGGAAAAGGACC	TGATTGTAGTGCTTTCTGGCTGGGCTCC	56	40
hMYC(endo)	GCGTCCTGGGAAGGGAGATCCGGAGC	TTGAGGGGCATCGTCGCGGGAGGCTG	56	40
hNANOG	CAGCCCCGATTCTTCCACCAGTCCC	CGGAAGATTCCCAGTCGGGTTCACC	56	35
hGDF3	CTTATGCTACGTAAAGGAGCTGGG	GTGCCAACCCAGGTCCCGGAAGTT	56	40
hREX1	CAGATCCTAAACAGCTCGCAGAAT	GCGTACGCAAATTAAAGTCCAGA	60	35
hDPPA2	CCGTCCCCGCAATCTCCTTCCATC	ATGATGCCAACATGGCTCCCGGTG	56	40
hDPPA4	GGAGCCGCCTGCCCTGGAAAATTC	TTTTTCCTGATATTCTATTCCCAT	56	40
hOCT3/4(transgene)	CCCGAAAGAGAAAGCGAACCAG	AATGTATCGAAGGTGCTCAA	54	35
hSOX2(transgene)	ACAAGAGAAAAAACATGTATGG	ATGCGCTGGTTCACGCCCGCGCCCAGG	54	35
hKLF4(transgene)	ACAAGAGAAAAAACATGTATGG	CGCGCTGGCAGGGCCGCTGCTCGAC	54	35
hMYC(transgene)	TAACTGACTAGCAGGCTTGTCG T	CCACATACAGTCCTGGATGATGATG	54	35
GAPDH	CAGAACATCATCCCTGCCTCTAG	TTGAAGTCAGAGGAGACCACCTG	54	35
SeV	GGATCACTAGGTGATATCGAGC	ACCAGACAAGAGTTTAAGAGATATGTATC	54	35
Bisulfite Sequencing
mehNANOG	TGGTTAGGTT GGTTTTAAAT TTTTG	AACCCACCCT TATAAATTCT CAATTA	56.8	45
mehOCT4	ATTTGTTTTT TGGGTAGTTA AAGGTA	CCAACTATCT TCATCTTAAT AACATCCA	50	45
RT-PCR for Ebs
PAX6	GGGTTGCATAGGCAGGTTAT	GAGGCCCTGGAGAAAGAGTT	60	35
MAP2	TCCAAATGTGGCTCTCTGAA	CCAGACGAGGAGACATTGCT	60	35
GFAP	CAGAGCCTCAAGGACGAGA	AGAGGCGGAGCAACTATCCT	60	35
hBRACHYURY	GTCCACCTGCAAATCCTCAT	GGTGAGGGGTGTGTAGTGC	60	35
MSX1	AGAAGATGCGCTCGTCAAAG	GCCGAGAGGGAAGGAGAG	60	35
FOXA2	ATTGCTGGTCGTTTGTTGTG	CTCAGGCTGGGACTCAAGTG	60	35
SOX17	AAGGGCGAGTCCCGTATC	CTTGTAGTTGGGGTGGTCCT	60	35
AFP	GTCTGCAGGATGGGGAAAA	GCTTGGCTCTCCTGGATGTA	60	35

## Sheet: Sheet2
PAX6	ACCCATTATCCAGATGTGTTTGCCCGAG
	ATGGTGAAGCTGGGCATAGGCGGCAG
MAP2	CAGGTGGCGGACGTGTGAAAATTGAGAGTG
	CACGCTGGATCTGCCTGGGGACTGTG
GFAP	GGCCCGCCACTTGCAGGAGTACCAGG
	CTTCTGCTCGGGCCCCTCATGAGACG
hBRACHYURY	GCCCTCTCCCTCCCCTCCACGCACAG
	CGGCGCCGTTGCTCACAGACCACAGG
MSX1	CGAGAGGACCCCGTGGATGCAGAG
	GGCGGCCATCTTCAGCTTCTCCAG
FOXA2	TGGGAGCGGTGAAGATGGAAGGGCAC
	TCATGCCAGCGCCCACGTACGACGAC
SOX17	CGCTTTCATGGTGTGGGCTAAGGACG
	TAGTTGGGGTGGTCCTGCATGTGCTG
AFP	GAATGCTGCAAACTGACCACGCTGGAAC
	TGGCATTCAAGAGGGTTTTCAGTCTGGA
